# Supplementary material
Source: HighWire-hosted journal article supplement (http://www.cmaj.ca/highwire/filestream/59329/field_highwire_adjunct_files/0/141417-com-appendix_1.pdf)
Supplement: 141417-com-appendix_1.pdf [file 141417-com-appendix_1.pdf]

## **Appendix 1: Additional resources**

Forgie SE, Duff JP, Ross S. Twelve tips for using Twitter as a learning tool in medical education. *Med Teach* 2013;35:8-14.

Kaczmarczyk JM, Chuang A, Dugoff L, et al. e-Professionalism: a new frontier in medical education. *Teach Learn Med* 2013;25:165-70.

Seaman J, Tinti-Kane H. *Social media for teaching and learning*. Boston: Pearson Learning Solutions and the Babson Survey Research Group; 2013:1-34.
